# Supplementary material
Source: PubMed Central journal article supplement (PMC2785618)
Supplement: supp_M109.003129_jbc.M109.003129-1.pdf [file supp_M109.003129_jbc.M109.003129-1.pdf]

# **The Tec family kinase Itk exists as a folded monomer in vivo**

**Qian Qi<sup>1,2</sup> and Avery August<sup>1†</sup>**

**<sup>1</sup>Center for Molecular Immunology & Infectious Disease and Department of  
Veterinary & Biomedical Sciences, <sup>2</sup>Immunology & Infectious Disease Graduate  
Program, The Pennsylvania State University, University Park, PA 16802**

†Address Correspondence to: Avery August, Center for Molecular Immunology & Infectious Disease, Department of Veterinary & Biomedical Science, 115 Henning Building, The Pennsylvania State University, University Park, PA 16802, Ofc: 814-863-3539, Fax: 814-863-6140, Email: axa45@psu.edu

## **Supplemental Figure**

## **Supplemental Figure Legends**

### **Supplemental Figure 1. Models of Itk as suggested by the experimental results. A)**

Models that account for the results of experiments shown in figure 1. Note that the reversible arrows refer to the untagged kinase and not the YFF tagged kinase, whose interactions may be irreversible. **B)** WT and R29C PH mutant of Itk. **C)** Model that account for the results of experiments shown in figure 3. **D)** Models that account for the results of experiments shown in figure 3. **E)(i)** Model that account for the results of experiments shown in figure 3. **(ii)& (iii)** Models that account for the results of experiments shown in figure 3. **F)** Models that account for the results of experiments shown in figure 5.

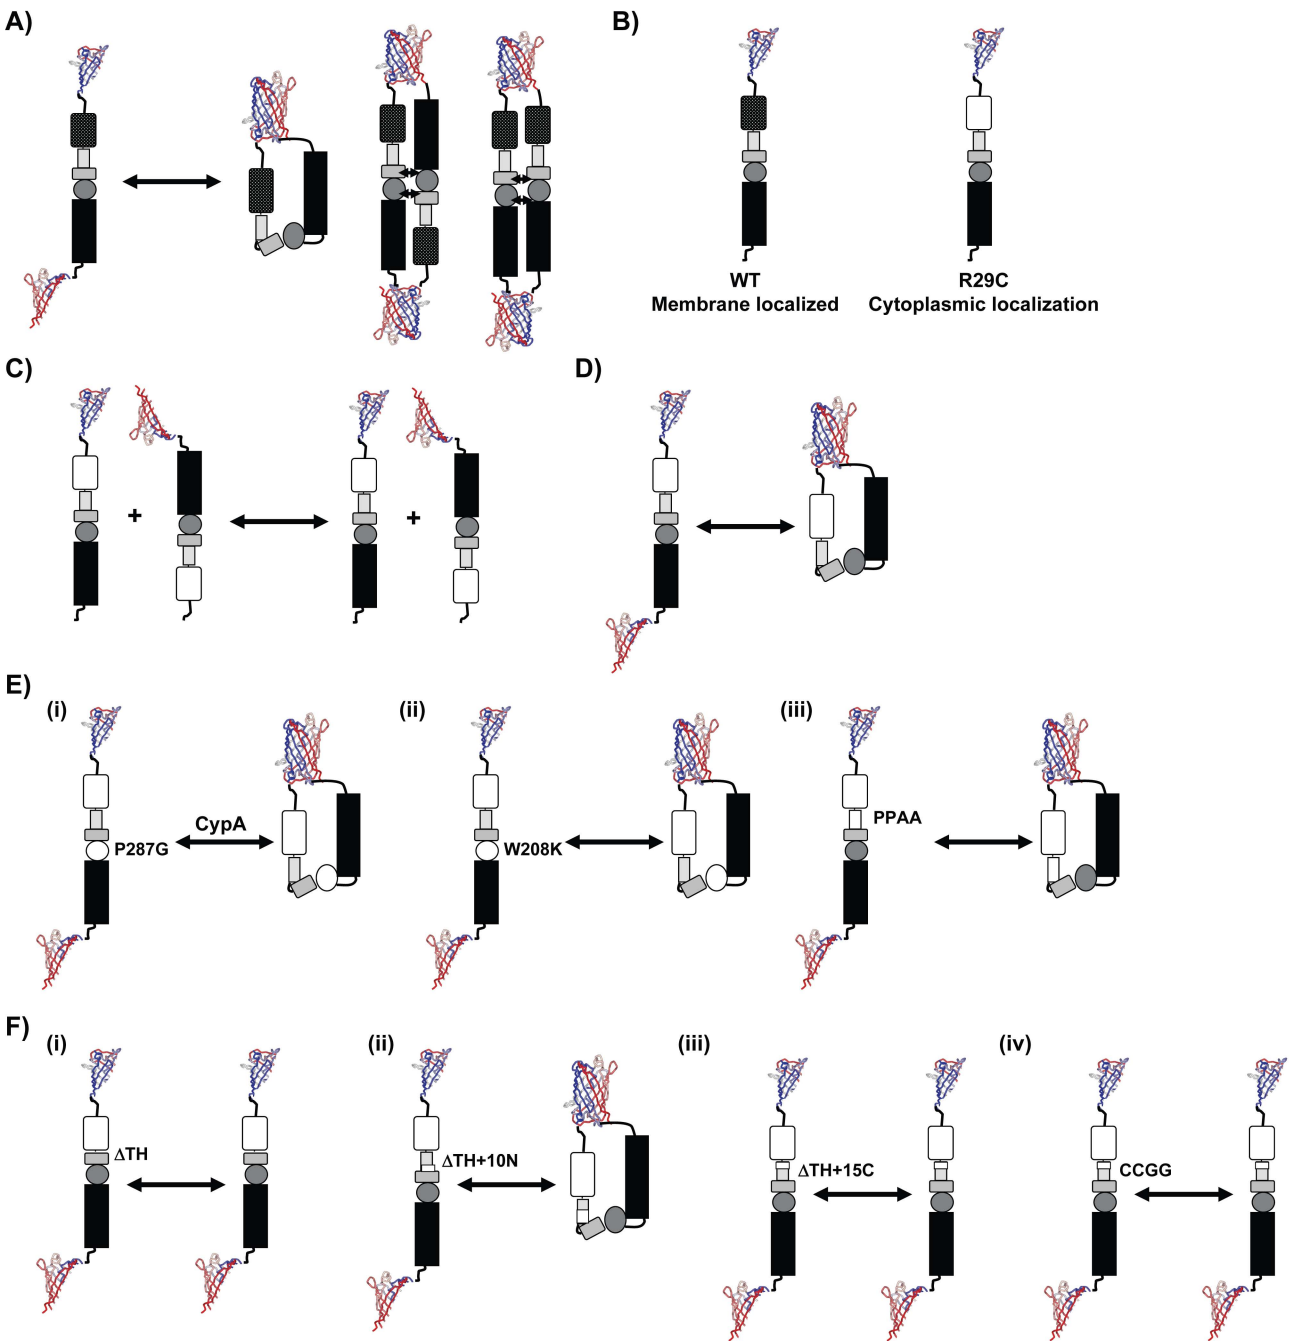

Supplemental Figure 1
